# Supplementary material for: Deeply revealing the deactivation and decomposition mechanism of ammonium bisulfate on nanotube structured SCR catalysts for the low-temperature NH3-SCR reaction
Source: Royal Society of Chemistry journal article supplement (doi:10.1039/d4cy01292e), 2024-12-31
Supplement: d4cy01292e1.pdf [file d4cy01292e1.pdf]

## Supporting Information

### **Deeply revealing the deactivation and decomposition mechanism of ammonium bisulfate on the nanotube structured SCR catalyst for low-temperature NH<sub>3</sub>-SCR reaction**

Qiang Zhao<sup>a,b</sup>, Xiaosheng Huang<sup>a\*</sup>, Guodong Zhang<sup>a</sup>, Rongji Cui<sup>a</sup>, Jiyi Zhang<sup>b</sup>,

Zhicheng Tang<sup>a\*</sup>

*(<sup>a</sup> National Engineering Research Center for Fine Petrochemical Intermediates,  
State Key Laboratory for Oxo Synthesis and Selective Oxidation, Lanzhou Institute of  
Chemical Physics, Chinese Academy of Sciences, Lanzhou, 730000, China.*

*<sup>b</sup> School of Petroleum and Chemical, Lanzhou University of Technology,*

*Lanzhou 730050, China.)*

---

\*Corresponding author.

E-mail address: [tangzhicheng@licp.cas.cn](mailto:tangzhicheng@licp.cas.cn) (Z. Tang).

## 1. Catalyst characterizations

The microstructure of the catalysts was observed by JEOL JEM-2010 transmission electron microscope. Rigaku D/MAX-RB X-ray diffractometer (XRD) was used to scan the catalysts in the range of 10-80°. The catalysts were scanned in the range of 100-2000  $\text{cm}^{-1}$  by Lab Ram HR Evolution confocal microscope. The surface area and pore structure of the catalyst were detected and analyzed by  $\text{N}_2$  adsorption-desorption experiment using Micromeritics ASAP 2010 instrument. The surface acidity, oxidation reduction and sulfates desorption behavior of the catalysts was measured by Tian-jinXQ TP-5080D auto-adsorption apparatus equipped with a thermal conductivity detector (TCD). The test procedure of  $\text{H}_2$ -TPR was as follows: Firstly, 50 mg catalyst was pretreated in 30 mL/min nitrogen atmosphere at 300 °C for 1 h, then  $\text{N}_2$  as equilibrium gas and 5 vol%  $\text{H}_2$  as reduction gas was heated from 30 °C to 900 °C for desorption experiment. The test procedure of  $\text{NH}_3$ -TPD was as follows: the pretreatment process was consistent with  $\text{H}_2$ -TPR, then the catalyst was exposed to the atmosphere with  $\text{N}_2$  as equilibrium gas and  $\text{NH}_3$  content of 5 vol% at 100 °C for adsorption for 30 min. The temperature was raised to 800 °C in  $\text{N}_2$  atmosphere for desorption experiment after the  $\text{NH}_3$  valve was closed. The test procedure of He-TPD was as follows: 50 mg catalyst was pretreated in 30 mL/min helium atmosphere at 100 °C for 1 h, then the catalyst was exposed to the He atmosphere and elevated the temperature to 800 °C to observe the desorption behavior of sulfates. The NETZSCH STA 449F5 tester was used to increase the temperature from room temperature to 800 °C for TG/DSC testing of the catalyst.

The elemental compositions and valence states on the catalyst surface were qualitatively and quantitatively analyzed by XPS photoelectron spectrometer of VG ESCALAB 210 (Mg K $\alpha$  radiation was 1253.6 eV). The catalyst was tested at 500-4000 cm<sup>-1</sup> using Nexus 870 scanning Fourier transform infrared spectroscopy. To explore the reaction mechanism of the catalyst, in-situ DRIFTS experiment was performed on a Fourier Transform infrared (FTIR) spectrometer (VERTEX 70) equipped with a Harrick DRIFTS cell and a liquid nitrogen cooled mercury cadmium telluride (MCT) detector. Firstly, the catalyst was pretreated in the N<sub>2</sub> atmosphere (30 mL/min) for 30 min at 300 °C. The background spectrum was collected in the flow of N<sub>2</sub> after pretreatment and was automatically subtracted from the sample spectrum for each test. Then the catalyst was exposed into the NH<sub>3</sub> (1 vol%) or NO + O<sub>2</sub> (1 vol%) atmosphere for 30min at 50 °C. The desorption experiment was carried out in the N<sub>2</sub> atmosphere with the temperature gradually increased from 50 °C to 300 °C. For the transient reaction of NO + O<sub>2</sub> and pre-adsorption of NH<sub>3</sub>, the catalyst was first exposed to 1 vol% NH<sub>3</sub> gas at 200 °C for 30 min, then 1 vol% NO + O<sub>2</sub> was introduced for reaction. For the transient reaction of NH<sub>3</sub> and NO + O<sub>2</sub> pre-adsorption, the rest of the operation was the same as the previous steps except that the gas addition sequence was reversed.

Figure S1. N<sub>2</sub> selectivity of catalysts at different temperatures.

Figure S2. SEM images of Ce-Mn-TNTs (a) and Ce-Mn-TNTs-R (b).

Figure S3. XRD patterns of Ce-Mn-TNTs-R and Ce-Mn-TNTs-F.

Figure S4. He-TPD of catalysts.

Figure S5. N<sub>2</sub> adsorption-desorption isotherms (a-b) and BJH desorption pore size distribution (c) of catalysts.

Figure S6. N 1s spectra of the catalysts loaded with ABS.

Table S1. ICP results of catalysts.

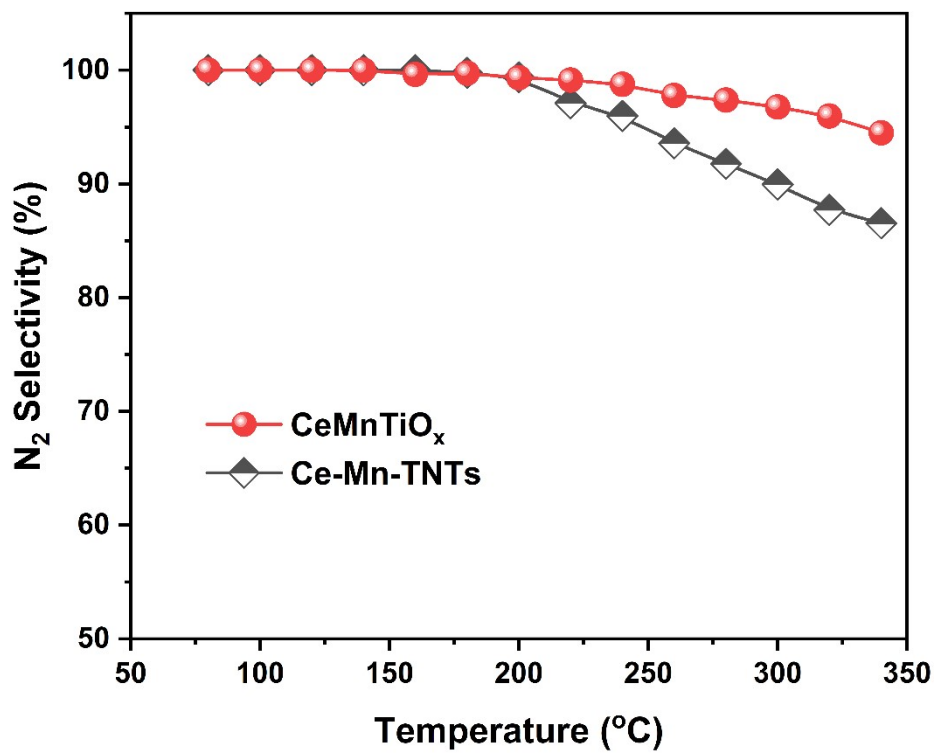

Figure S1. N<sub>2</sub> selectivity of catalysts at different temperatures.

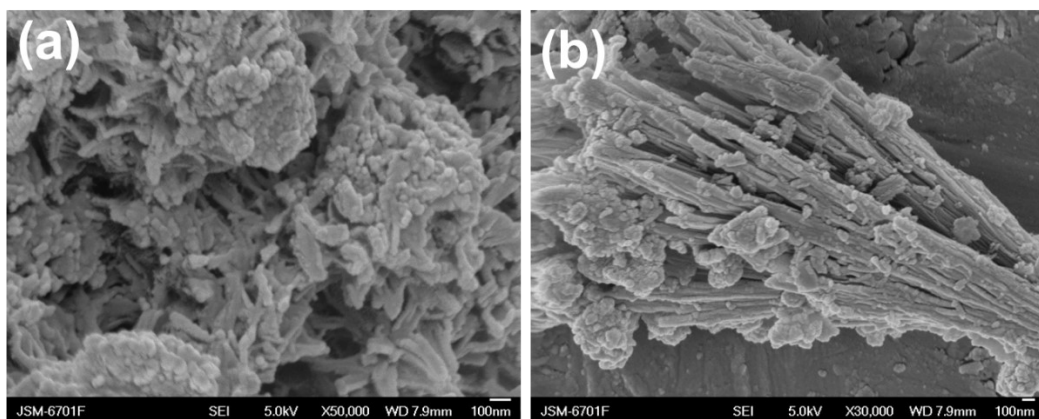

Figure S2. SEM images of Ce-Mn-TNTs (a) and Ce-Mn-TNTs-R (b).

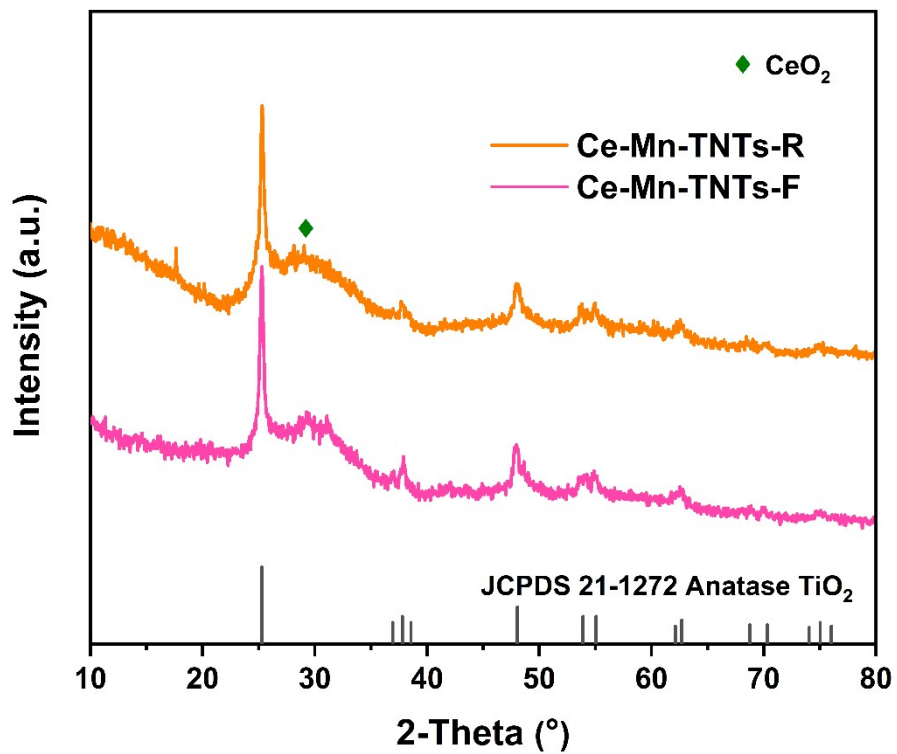

Figure S3. XRD patterns of Ce-Mn-TNTs-R and Ce-Mn-TNTs-F.

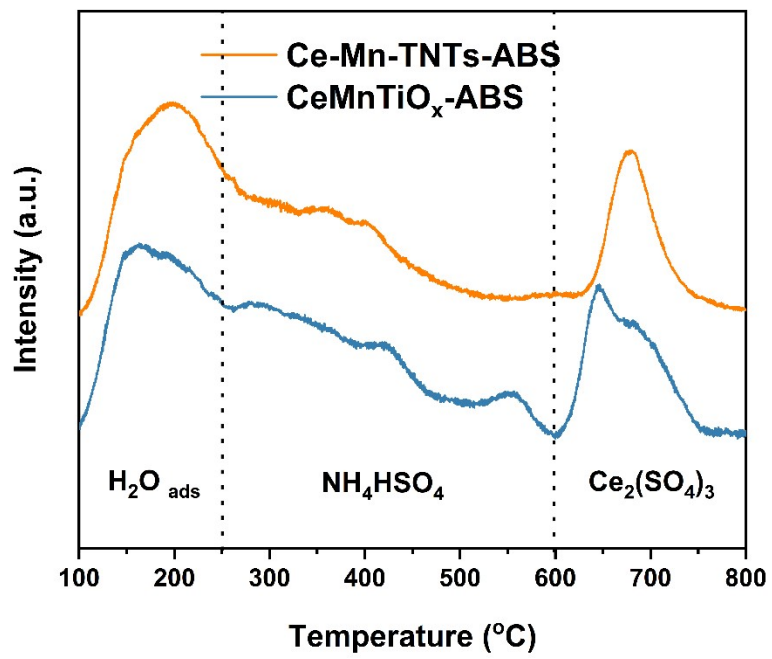

Figure S4. He-TPD of catalysts.



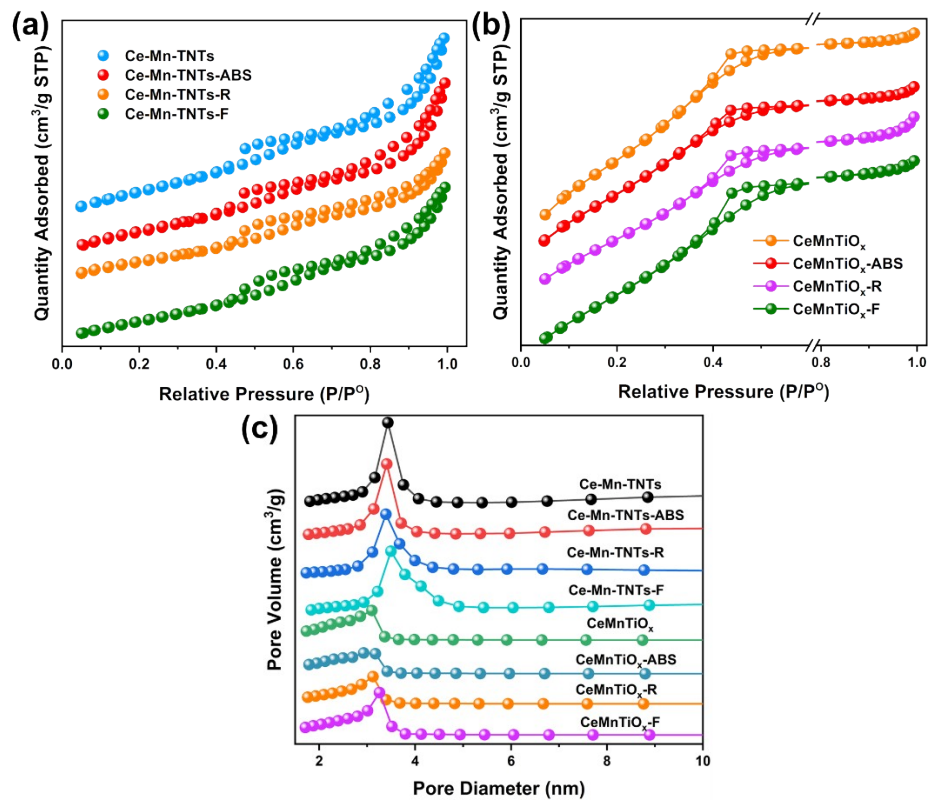

Figure S5. N<sub>2</sub> adsorption-desorption isotherms (a-b) and BJH desorption pore size distribution (c) of catalysts.

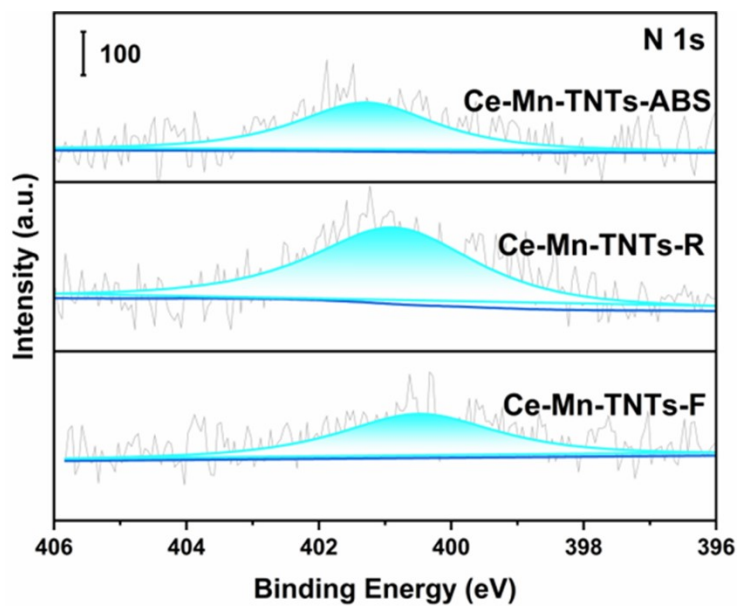

Figure S6. N 1s spectra of the catalysts loaded with ABS.

Table S1. ICP results of catalysts.

| Samples                   | S content (wt%) |
|---------------------------|-----------------|
| CeMnTiO <sub>x</sub> -ABS | 0.80            |
| CeMnTiO <sub>x</sub> -R   | 0.76            |
| CeMnTiO <sub>x</sub> -F   | 0.73            |
| Ce-Mn-TNTs-ABS            | 1.0             |
| Ce-Mn-TNTs-R              | 0.91            |
| Ce-Mn-TNTs-F              | 0.52            |
